# Supplementary material for: Topographical Vacuum Sealing of 3D-Printed Multiplanar Microfluidic Structures
Source: MDPI journal article supplement (doi:10.3390/bios11100395), 2021-10-15
Supplement: s1 [file s1]

# Topographical Vacuum Sealing of 3D-Printed Multiplanar Microfluidic Structures

Benjamin Heidt <sup>1,\*</sup>, Renato Rogosic <sup>1</sup>, Nils Leoné <sup>2</sup>, Eduardo J.S. Brás <sup>3</sup>, Thomas J. Cleij <sup>1</sup>, Jules A.W. Harings <sup>2</sup>, Hanne Diliën <sup>1</sup>, Kasper Eersels <sup>1</sup> and Bart van Grinsven <sup>1</sup>

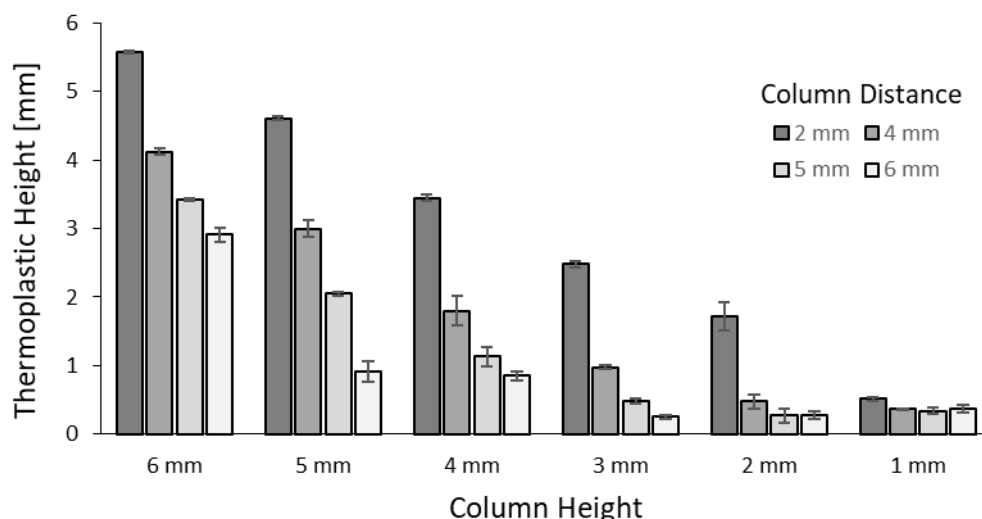

**Figure S1.** Detailed graph of the macro-structure alignment shown in Figure 5.

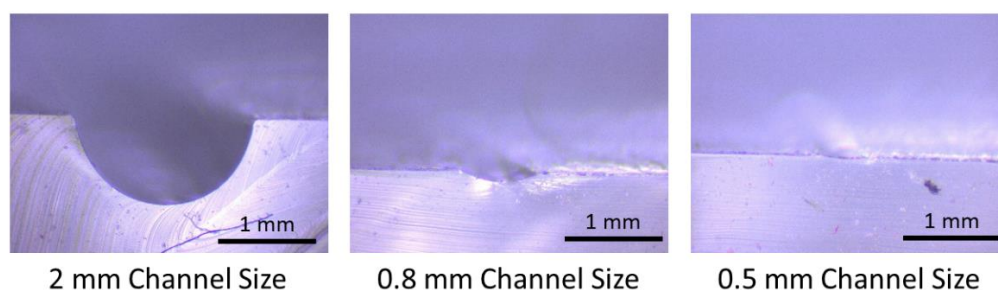

**Figure S2.** Example images of the PDMS negatives to measure channel intrusion, pictures display the intrusion into channels with sizes 2, 0.8 and 0.5 mm (left to right).

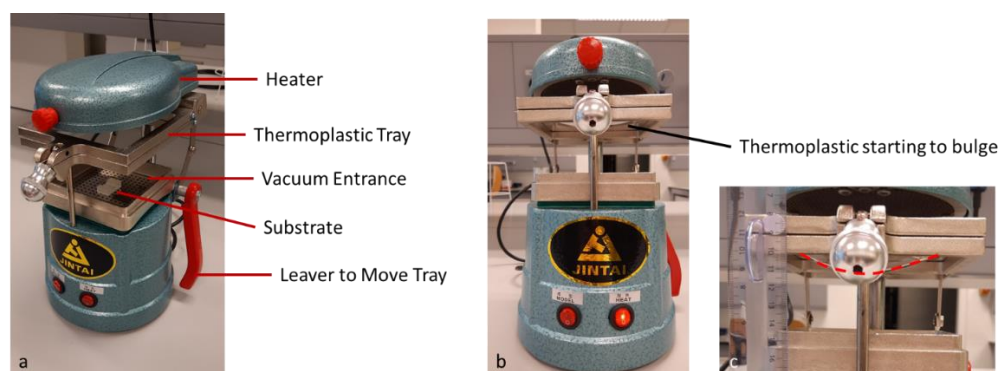

**Figure S3.** Low-cost vacuum former (a). The thermoplastic tray is moved under the heater and heated until the thermoplastic deforms and its bulge reaches 1 cm under the tray (b,c). The tray is then lowered over the substrate using the lever and the vacuum pump activated.

### Adhesive Layer

An adhesive layer was applied to a glass slide to observe and measure its distribution and profile. Figure S4 shows a microscopic image of the adhesive layer (without added thermoplastic) and Figure S5 shows its profile. The surface was measured with a DektakXT (Bruker) equipped with a stylus of 2  $\mu\text{m}$  radius and a force of 3 mg. The layer showed an average height of 1.75  $\mu\text{m}$  with a maximum of 7  $\mu\text{m}$ . Measurement directly on the 3D printed surface was difficult, however, as the print showed a similar roughness (2.22  $\mu\text{m}$ ) to the adhesive layer and no clear step was visible.

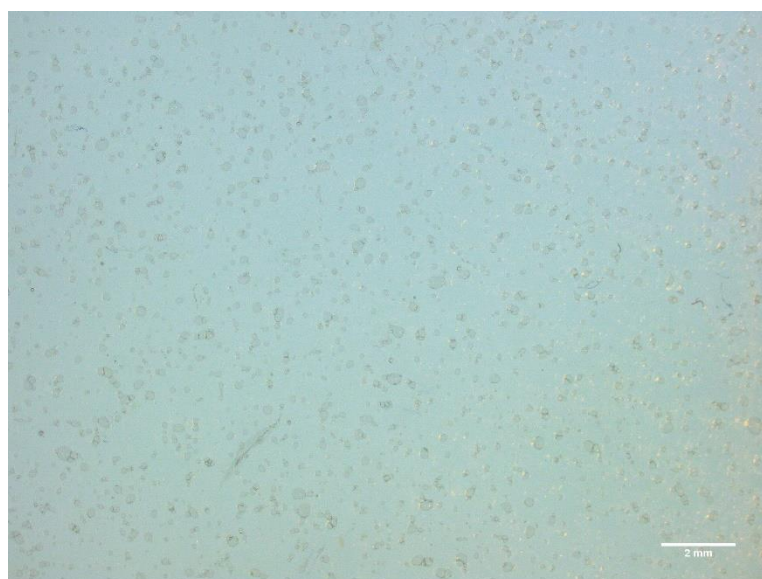

**Figure S4.** Distribution of spray adhesive after application on a glass slide and without the application of the thermoplastic.

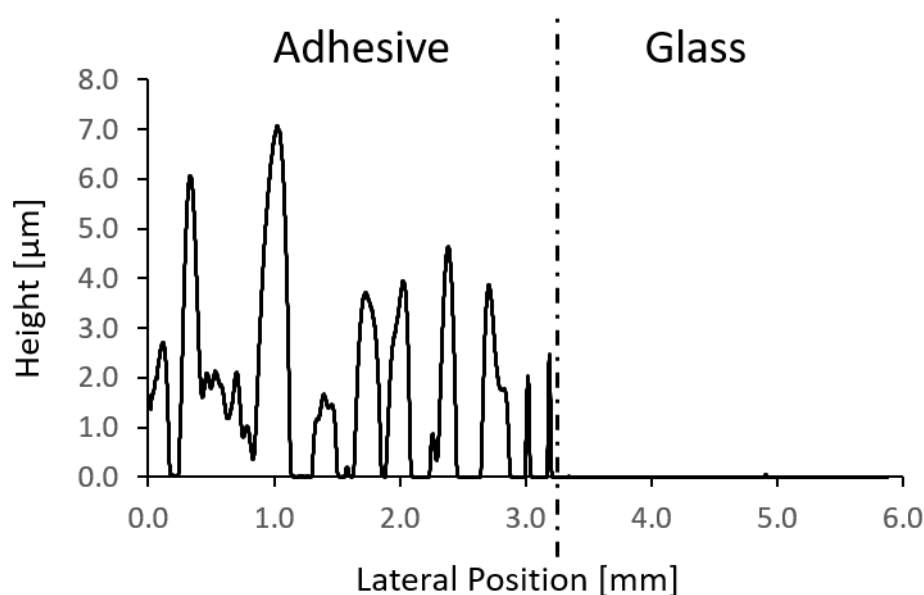

**Figure S5.** Profile of the adhesive layer on a glass slide.

### Thermoplastic Characteristics

Dynamic mechanical analysis was performed with a DMA1 (Mettler Toledo) with a heating rate of 3 °C per minute, displacement of 10  $\mu\text{m/s}$  and frequency of 1 Hz. Figure S6 shows the complex modulus and  $\tan \delta$ . Figure S7 displays the storage and loss modulus.

$\tan \delta$  displays two maxima, the first one being the glass transition temperature at 75 °C and the second one the sagging temperature at 140 °C.

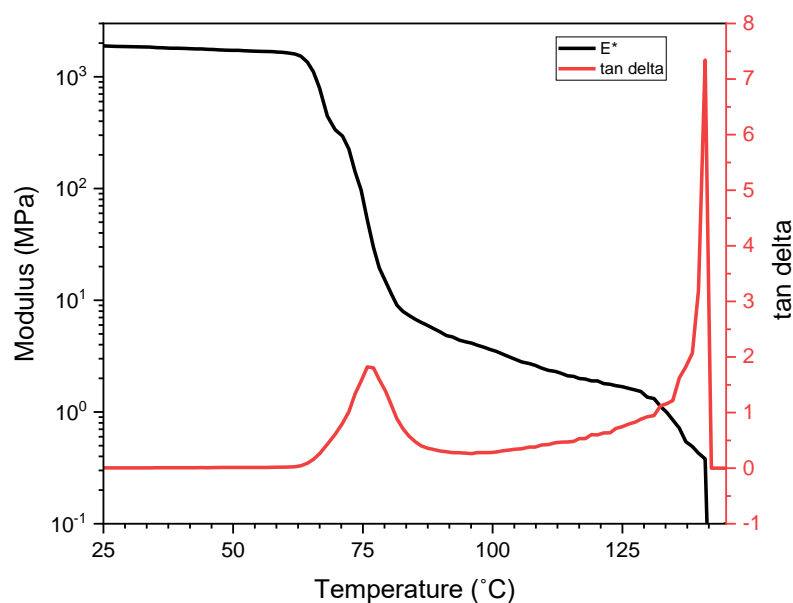

**Figure S6.** Complex modulus and  $\tan \delta$  as a function of temperature.

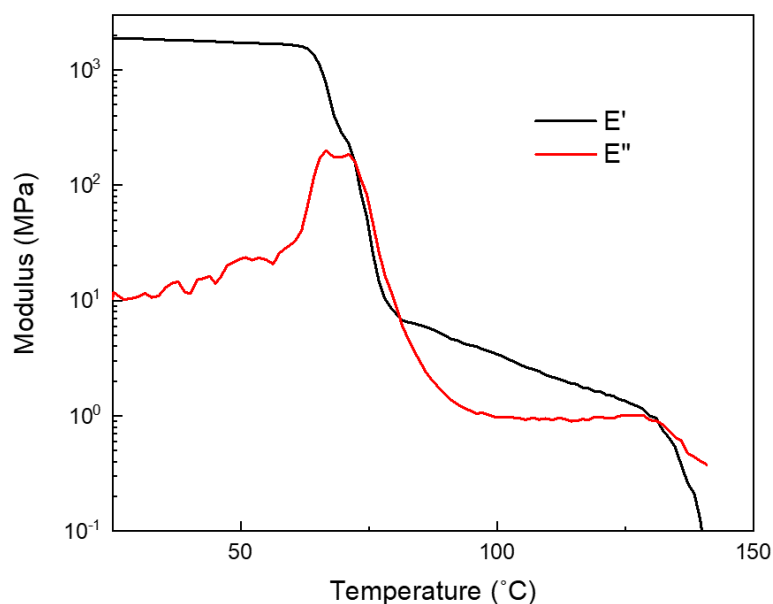

**Figure S7.** Storage Modulus  $E'$  and Loss Modulus  $E''$  as a function of temperature.

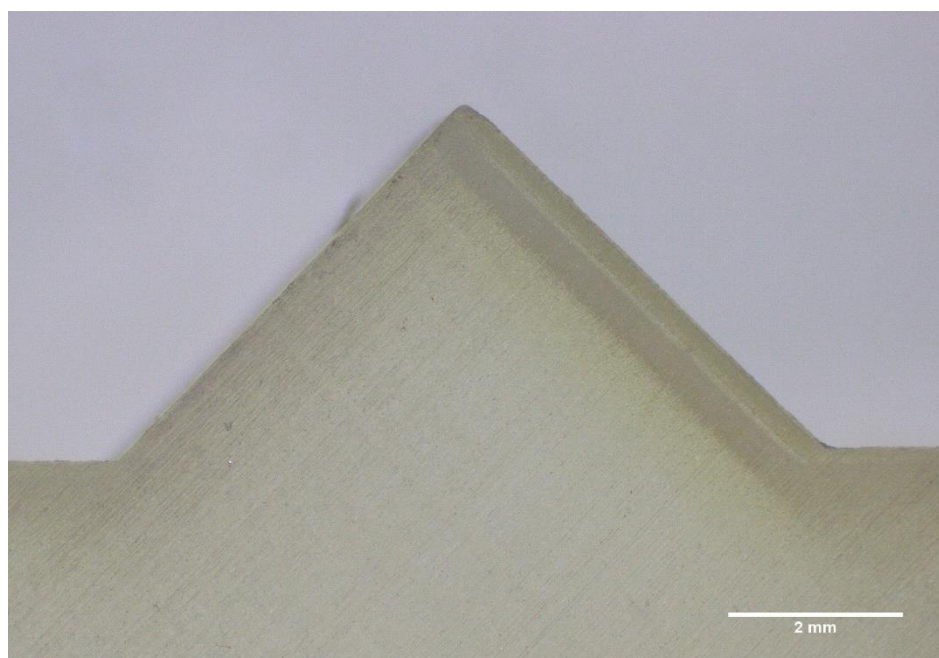

**Figure S8.** Image depicting the angle sharpness (angles:  $135^\circ$  and  $270^\circ$ ) of a 3D print before sealing.

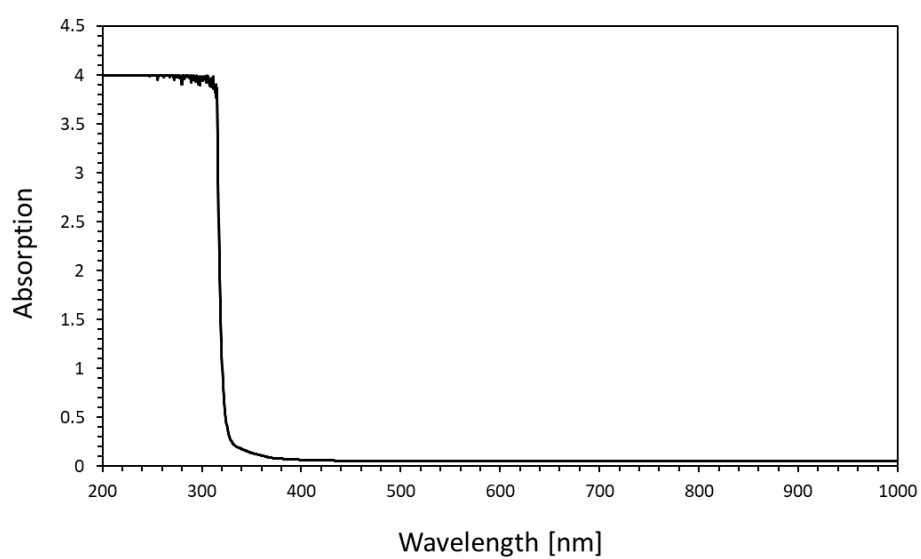

**Figure S9.** Absorbance spectrum of the Polyethylene Terephthalate Glycol sheet, acquired with a Shimadzu 1900i and a resolution of 0.5 nm.
